# Supplementary material for: Oral and Topical Anti-Inflammatory Activity of Jatropha integerrima Leaves Extract in Relation to Its Metabolite Profile
Source: MDPI journal article supplement (doi:10.3390/plants11020218), 2022-01-14
Supplement: s1 [file s1]

Spectrum from 181128-SM0022.wiff (sample 1) - 181128-SM0022, Experiment 5, +TOF MS<sup>2</sup> (50 - 1000) from 5.213 min  
Precursor: 553.1 Da, CE: 35.0

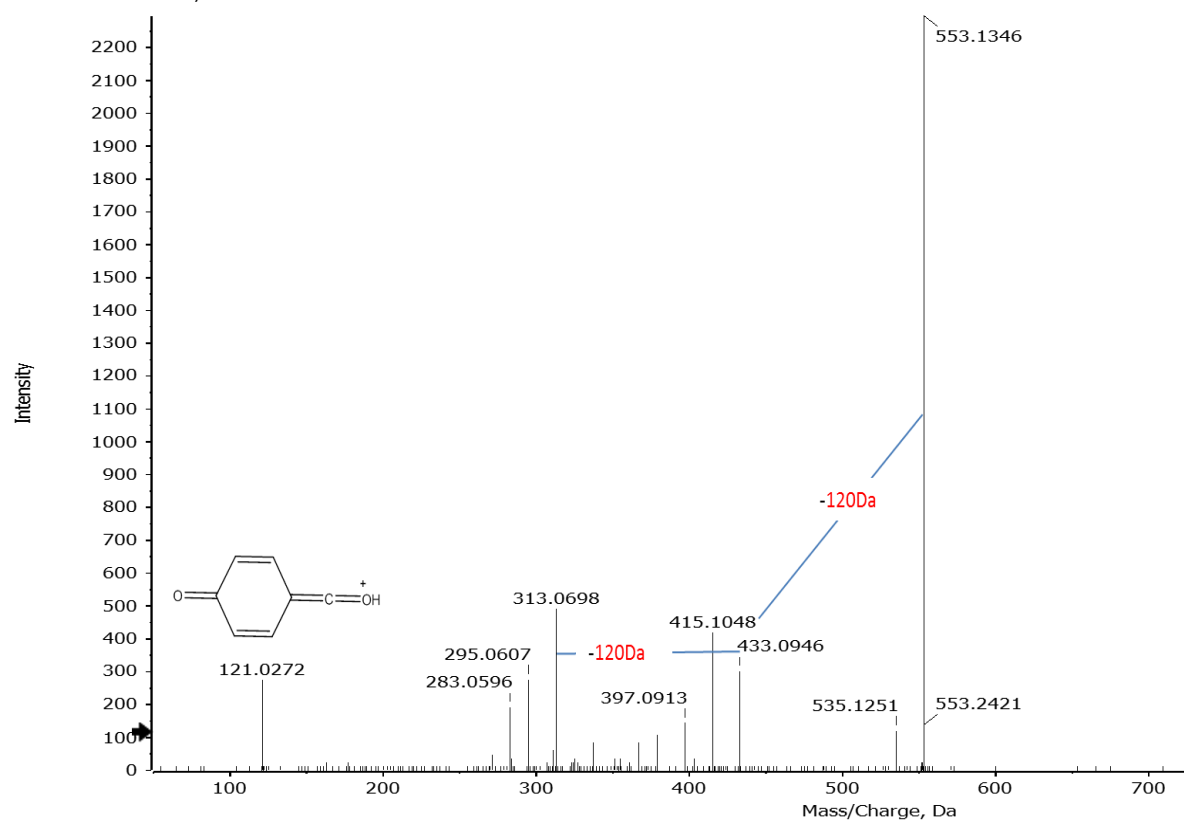

Figure S1. MS/MS spectrum of peak 29: Vitexin-p-hydroxybenzoate.

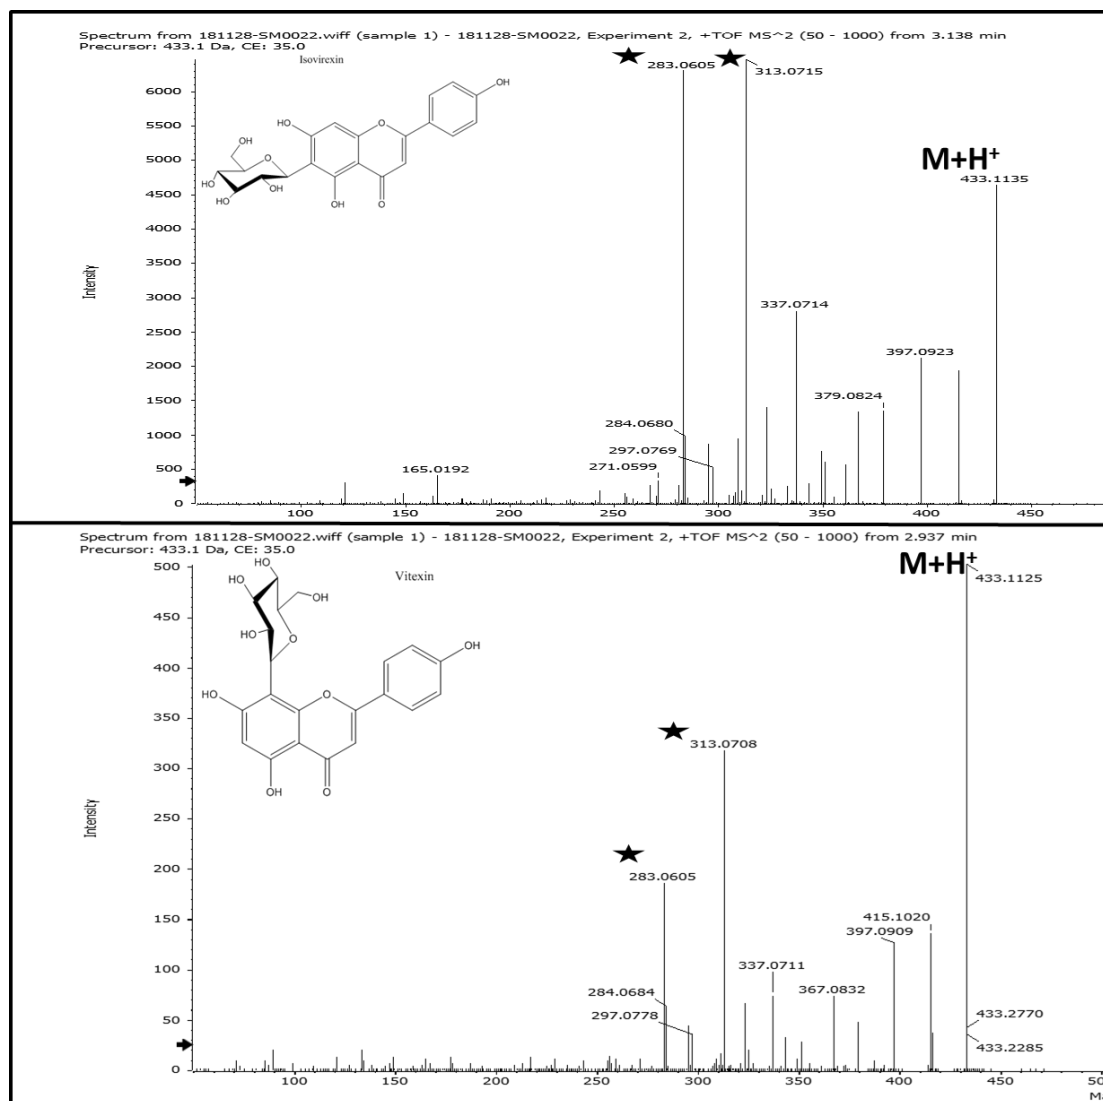

**Figure S2.** Fragmentation pattern highlighting different fragmentation of the two structural isomer vitexin and isovitaxin based on the intensity of 313 and 283 fragment ions.

Spectrum from 181128-SM0022.wiff (sample 1) - 181128-SM0022, Experiment 5, +TOF MS<sup>2</sup> (50 - 1000) from 5.241 min  
Precursor: 877.2 Da, CE: 35.0

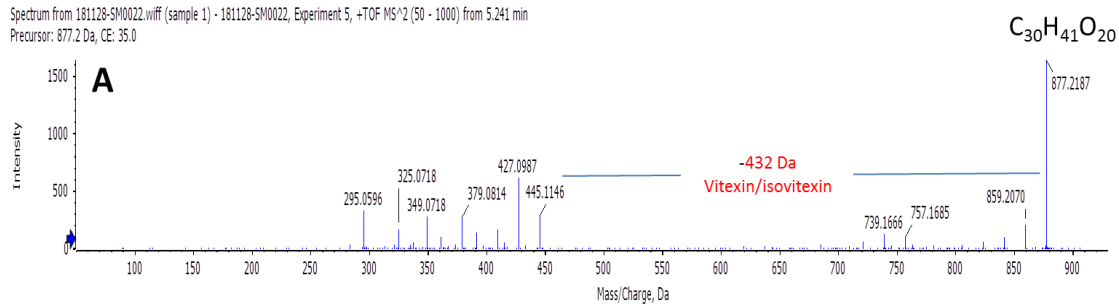

Spectrum from 181128-SM0022.wiff (sample 1) - 181128-SM0022, Experiment 4, +TOF MS<sup>2</sup> (50 - 1000) from 5.292 min  
Precursor: 877.2 Da, CE: 35.0

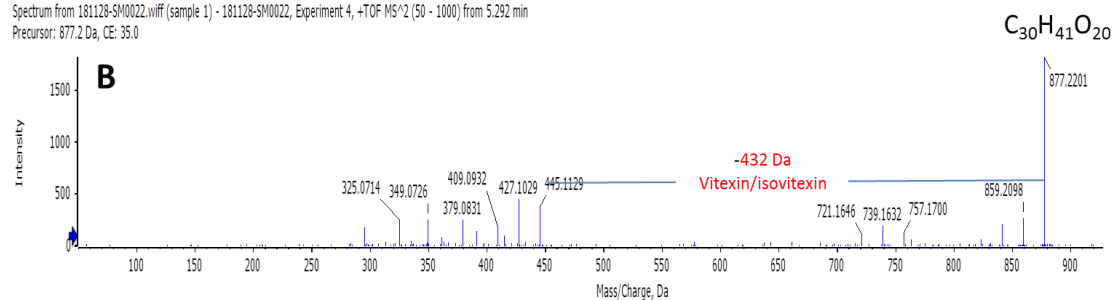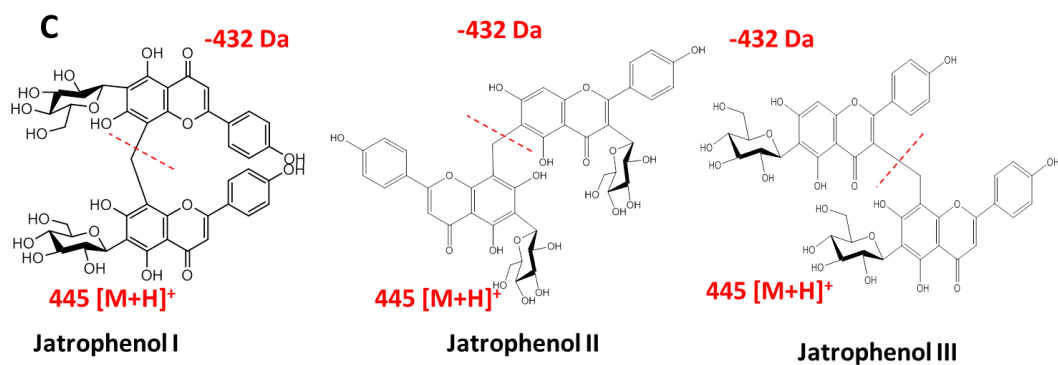

**Figure S3.** MS/MS spectrum of peaks 30 and 32: Jatrophanol I/II/III.

Spectrum from 181128-SM0022.wiff (sample 1) - 181128-SM0022, Experiment 8, +TOF MS<sup>2</sup> (50 - 1000) from 3.706 min  
Precursor: 560.2 Da, CE: 35.0

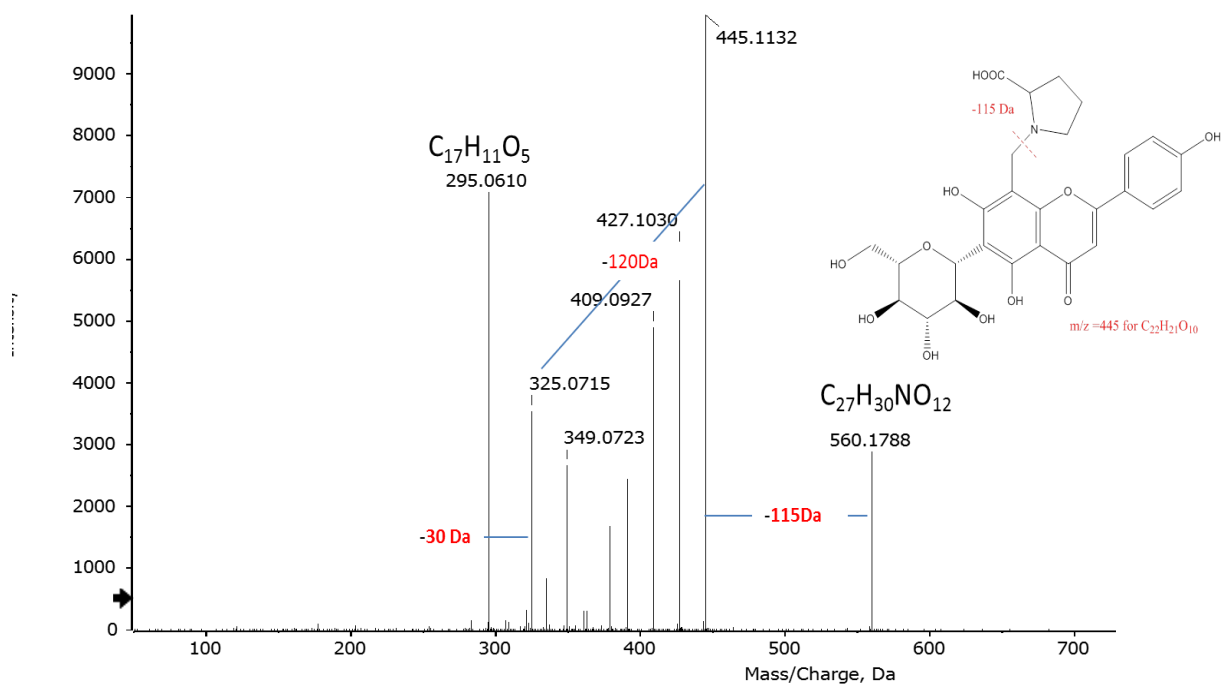

**Figure S4.** MS/MS spectrum of peak 35: Proline methylisovitexin.

Spectrum from 181128-SM0022.wiff (sample 1) - 181128-SM0022, Experiment 4, +TOF MS<sup>2</sup> (50 - 1000) from 6.215 min  
Precursor: 736.2 Da, CE: 35.0

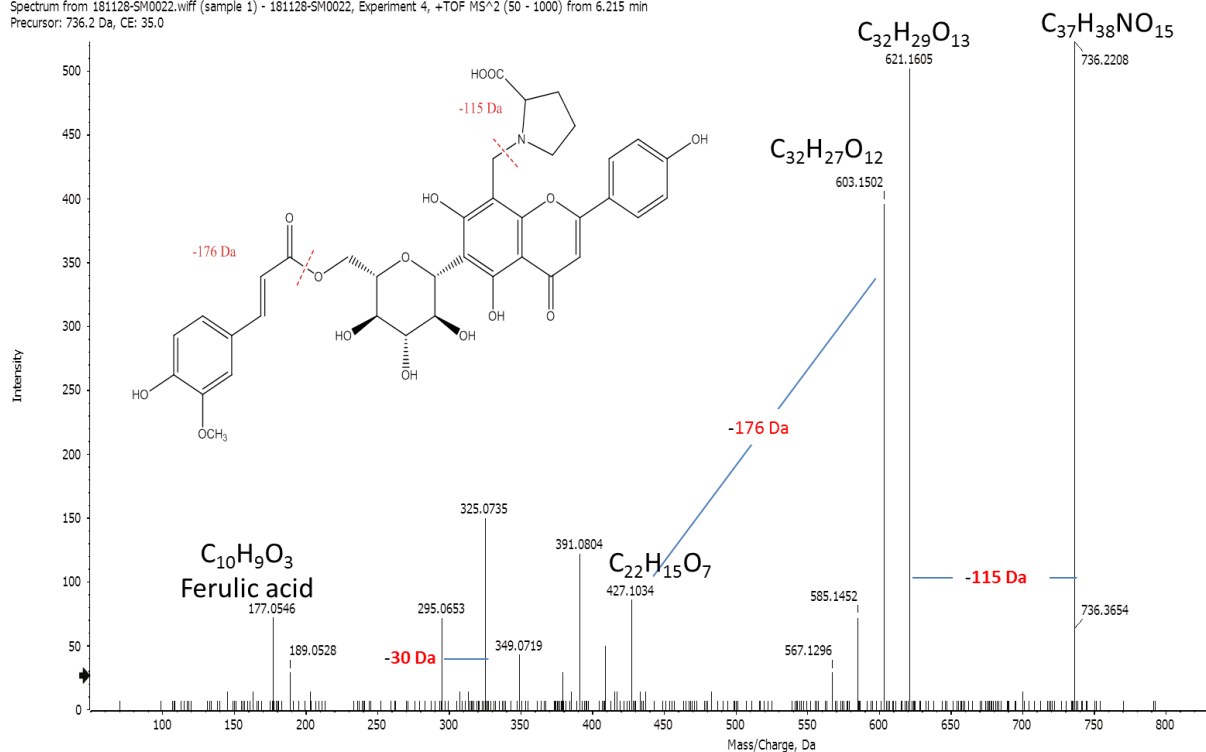

Figure S5. MS/MS spectrum of peak 35: Methylisovitexin proline ferulate.

Spectrum from 181128-SM0022.wiff (sample 1) - 181128-SM0022, Experiment 4, +TOF MS<sup>2</sup> (50 - 1000) from 4.396 min  
Precursor: 433.1 Da, CE: 35.0

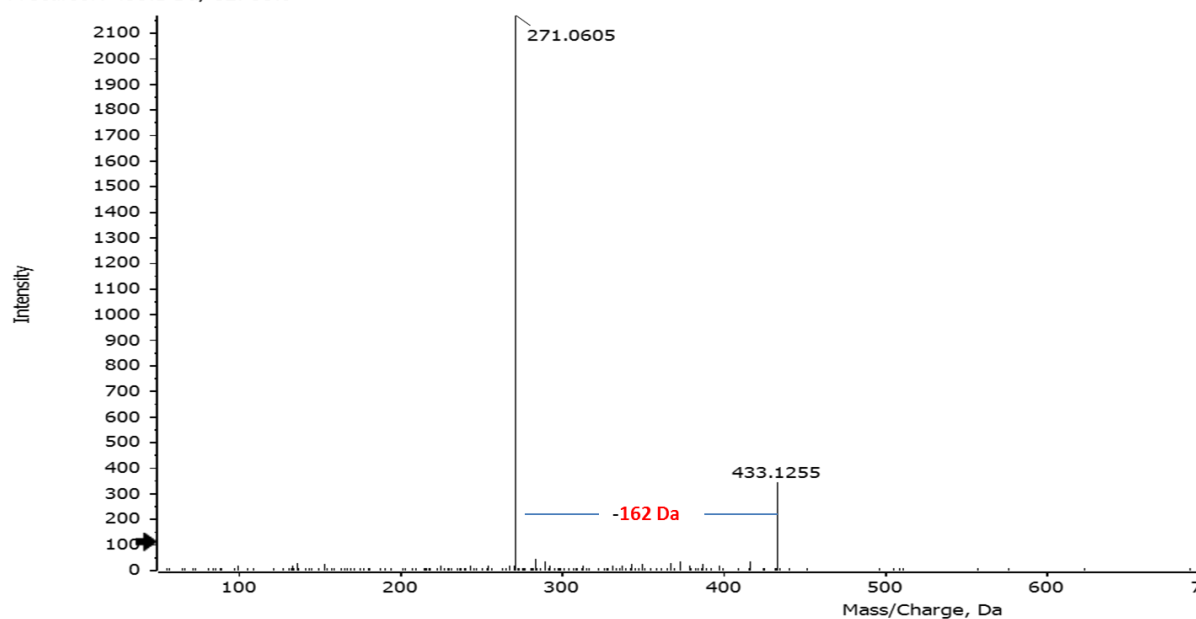

Figure S6. MS/MS spectrum of peak 26: Apigenin-O-hexoside.

Spectrum from 181128-SM0022.wiff (sample 1) - 181128-SM0022, Experiment 9, +TOF MS<sup>2</sup> (50 - 1000) from 4.253 min  
Precursor: 579.2 Da, CE: 35.0

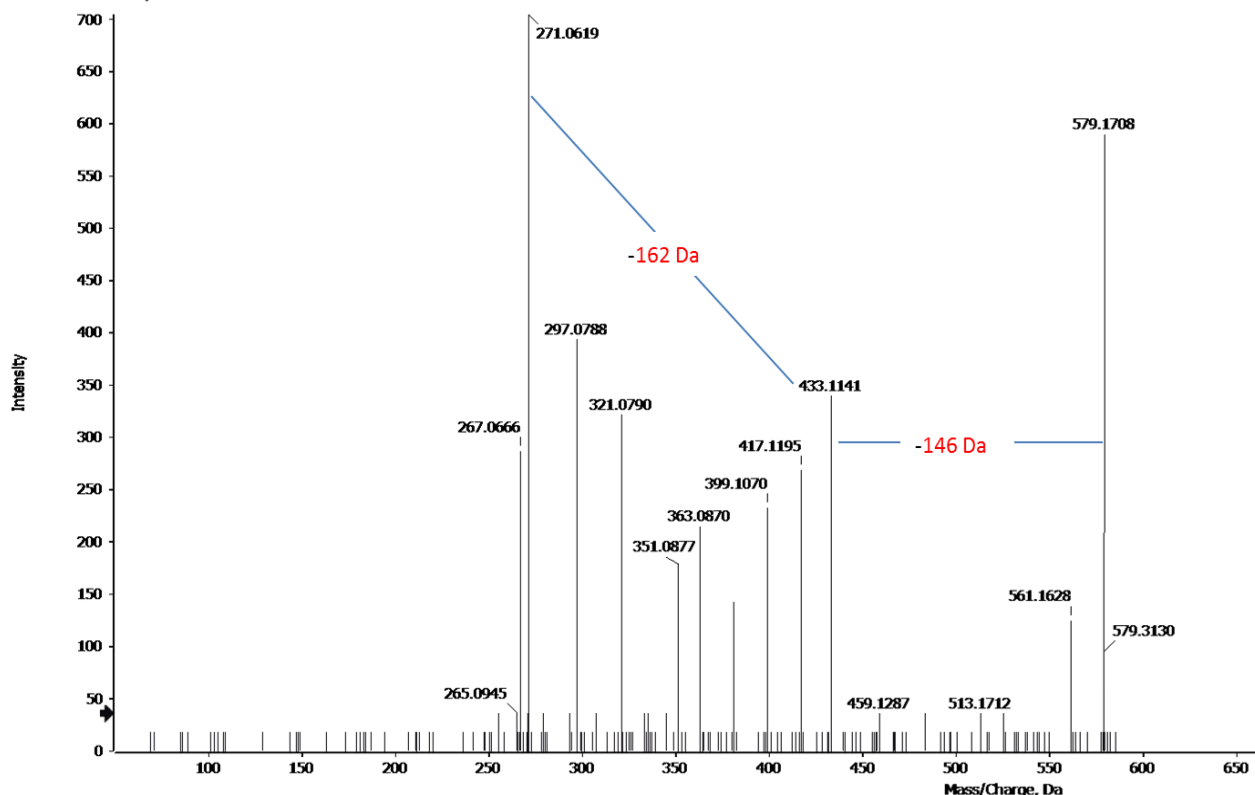

Figure S7. MS/MS spectrum of peak 25: Apigenin-O-hexoside-O-rhamnoside.

Spectrum from 181128-SM0022.wiff (sample 1) - 181128-SM0022, Experiment 7, +TOF MS<sup>2</sup> (50 - 1000) from 9.543 min  
Precursor: 722.5 Da, CE: 35.0

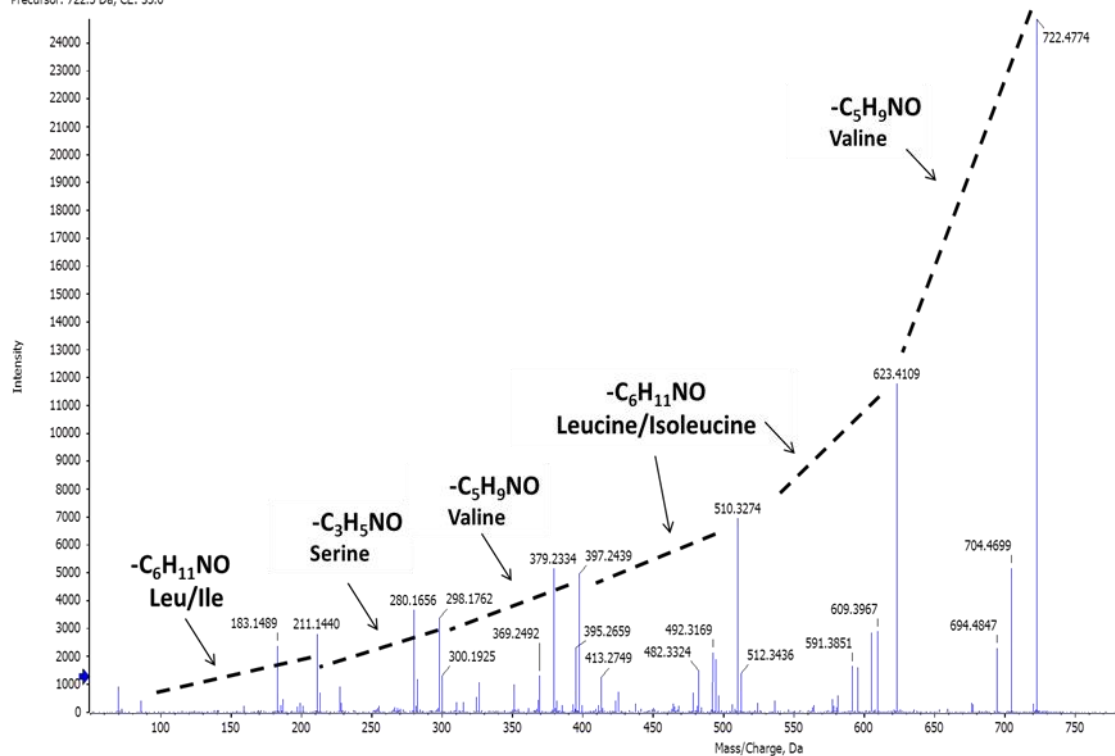

Figure S8. MS/MS spectrum of peak 43: A cycloheptapeptide.

Spectrum from 181128-SM0022.wiff (sample 1) - 181128-SM0022, Experiment 3, +TOF MS<sup>2</sup> (50 - 1000) from 9.591 min  
Precursor: 809.5 Da, CE: 35.0

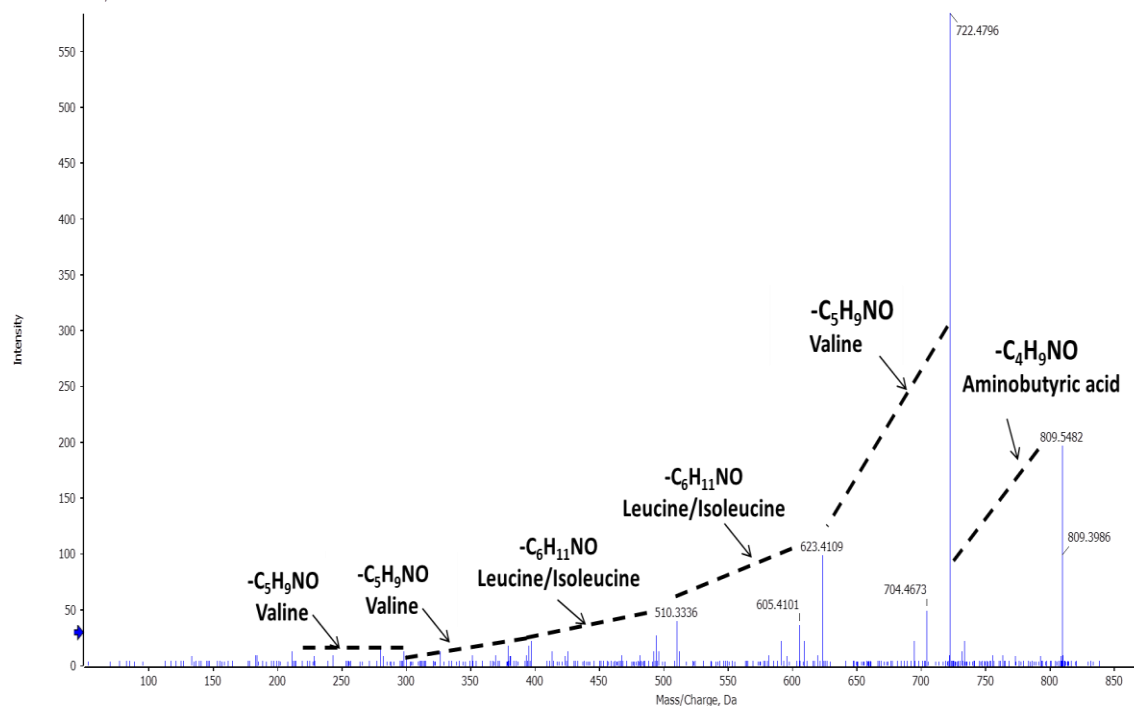

Figure S9. MS/MS spectrum of peak 45: A cyclooctapeptide.

Spectrum from 181128-SM0022.wiff (sample 1) - 181128-SM0022, Experiment 8, +TOF MS<sup>2</sup> (50 - 1000) from 9.616 min  
Precursor: 767.5 Da, CE: 35.0

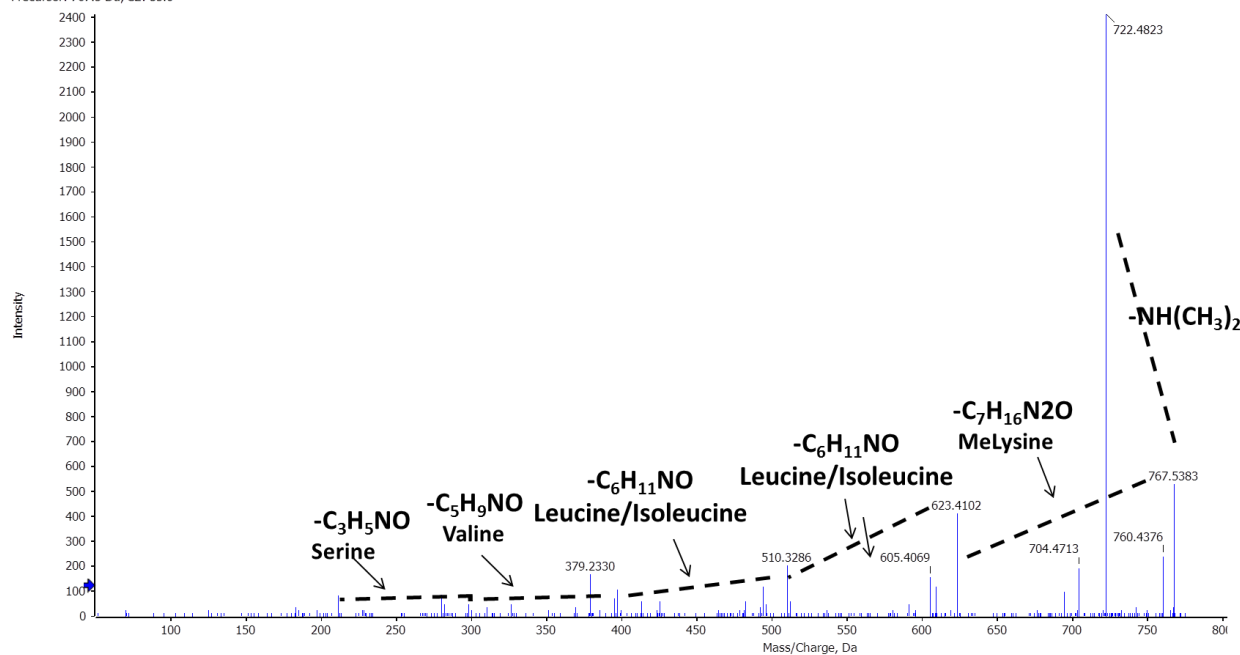

Figure S10. MS/MS spectrum of peak 46: A cycloheptapeptide.

Spectrum from 181128-SM0022.wiff (sample 1) - 181128-SM0022, Experiment 6, +TOF MS<sup>2</sup> (50 - 1000) from 10.554 min  
Precursor: 668.4 Da, CE: 46.5

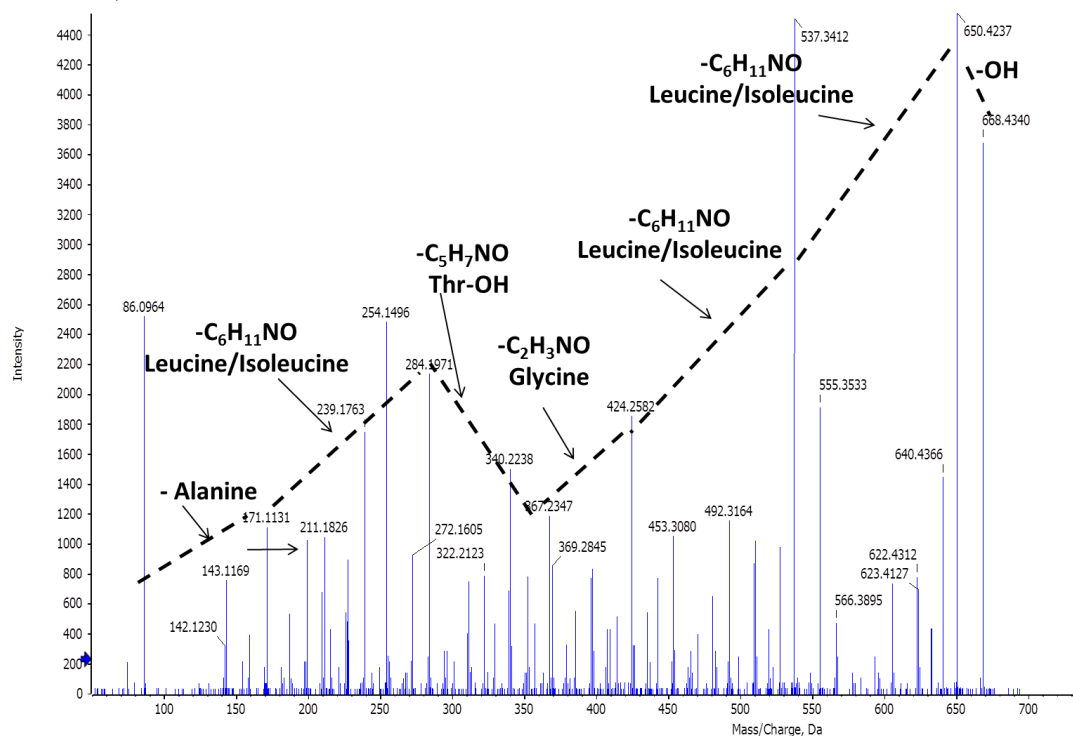

**Figure S11.** MS/MS spectrum of peak 46: A cycloheptapeptide.

Spectrum from 181128-SM0022.wiff (sample 1) - 181128-SM0022, Experiment 2, +TOF MS<sup>2</sup> (50 - 1000) from 11.364 min  
Precursor: 301.2 Da, CE: 35.0

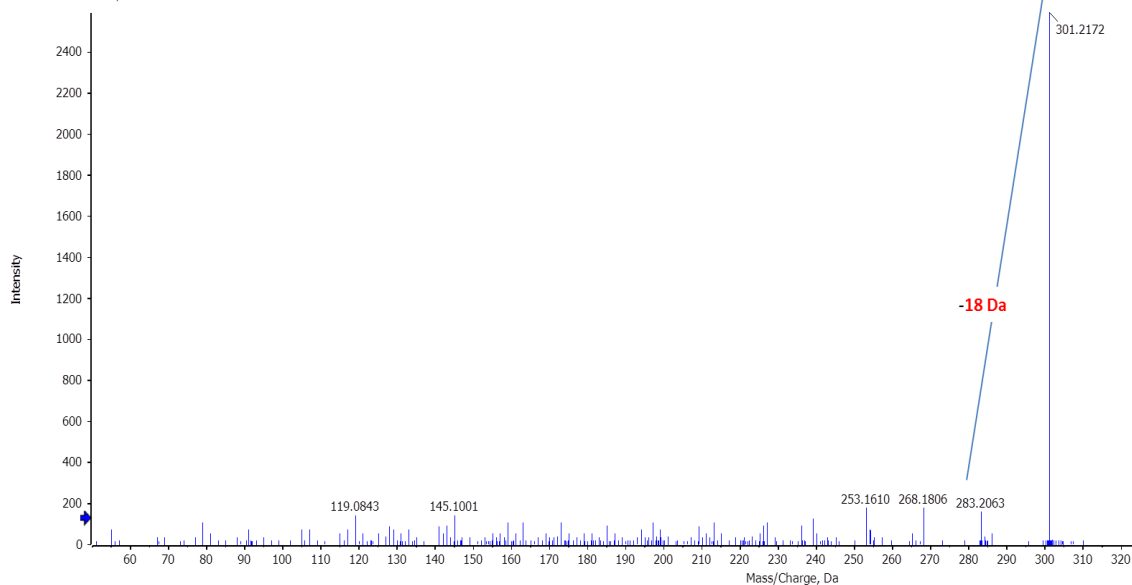

**Figure S12.** MS/MS spectrum of peak 59: Spruceanol.

Spectrum from 181128-SM0022.wiff (sample 1) - 181128-SM0022, Experiment 3, +TOF MS<sup>2</sup> (50 - 1000) from 11.952 min  
Precursor: 275.2 Da, CE: 35.0

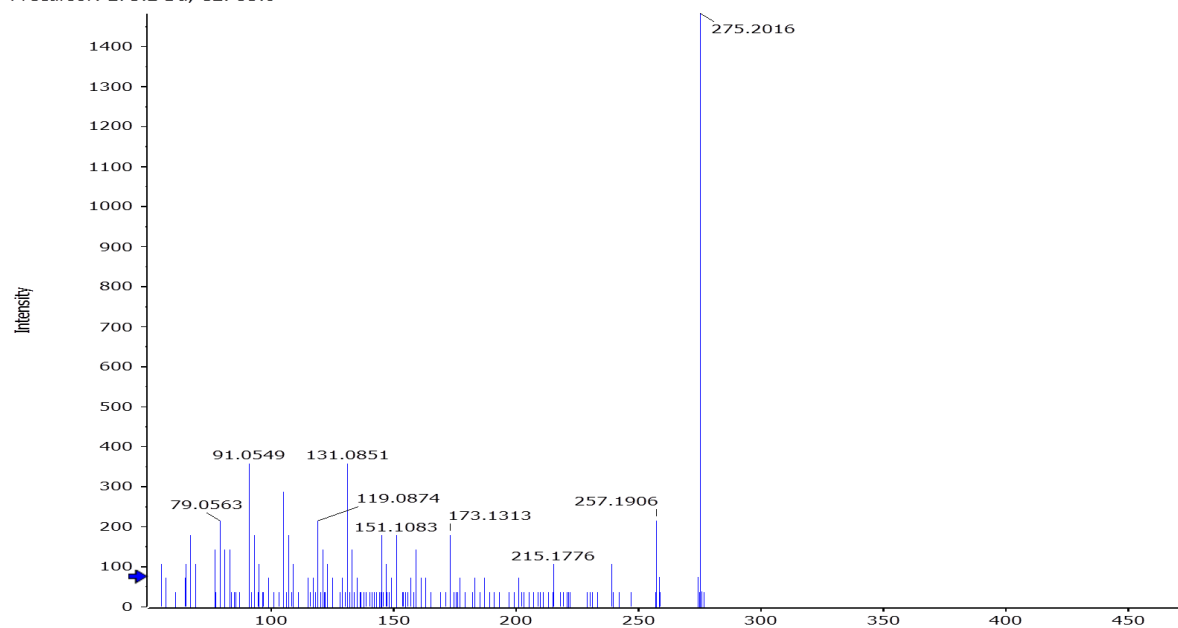

Figure S13. MS/MS spectrum of peak 61.

Spectrum from 181128-SM0022.wiff (sample 1) - 181128-SM0022, Experiment 2, +TOF MS<sup>2</sup> (50 - 1000) from 12.420 min  
Precursor: 411.2 Da, CE: 35.0

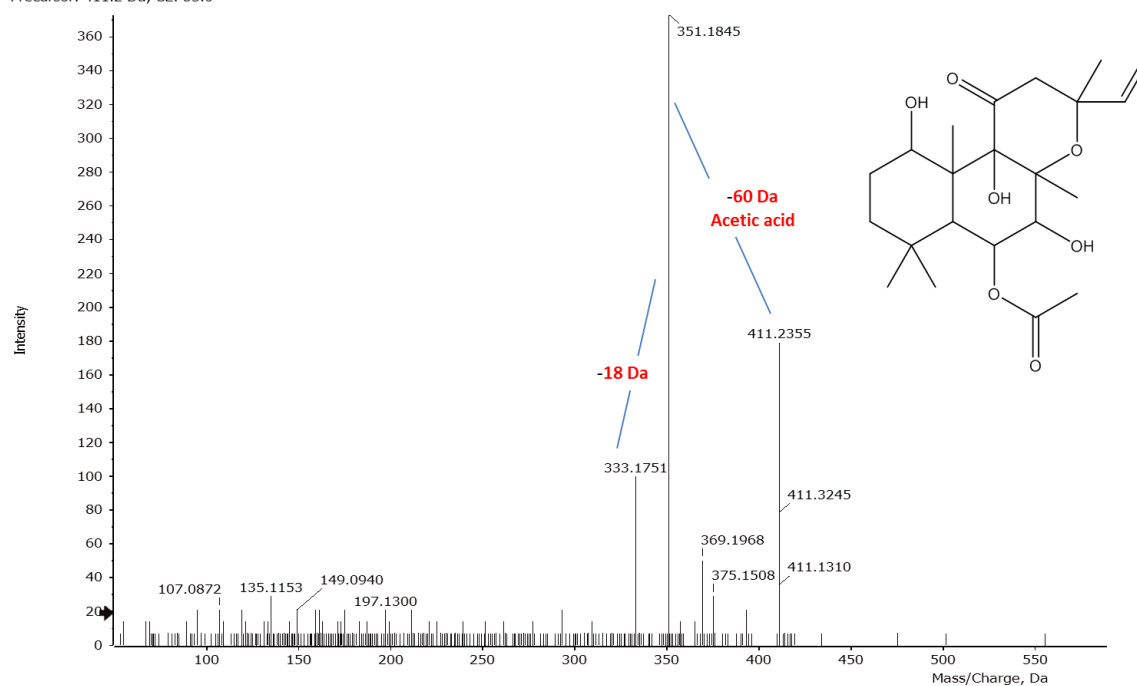

Figure S14. MS/MS for peak 67: Isoforskolin.



Spectrum from 181128-SM0022.wiff (sample 1) - 181128-SM0022, Experiment 3, +TOF MS<sup>2</sup> (50 - 1000) from 20.410 min  
Precursor: 637.3 Da, CE: 35.0

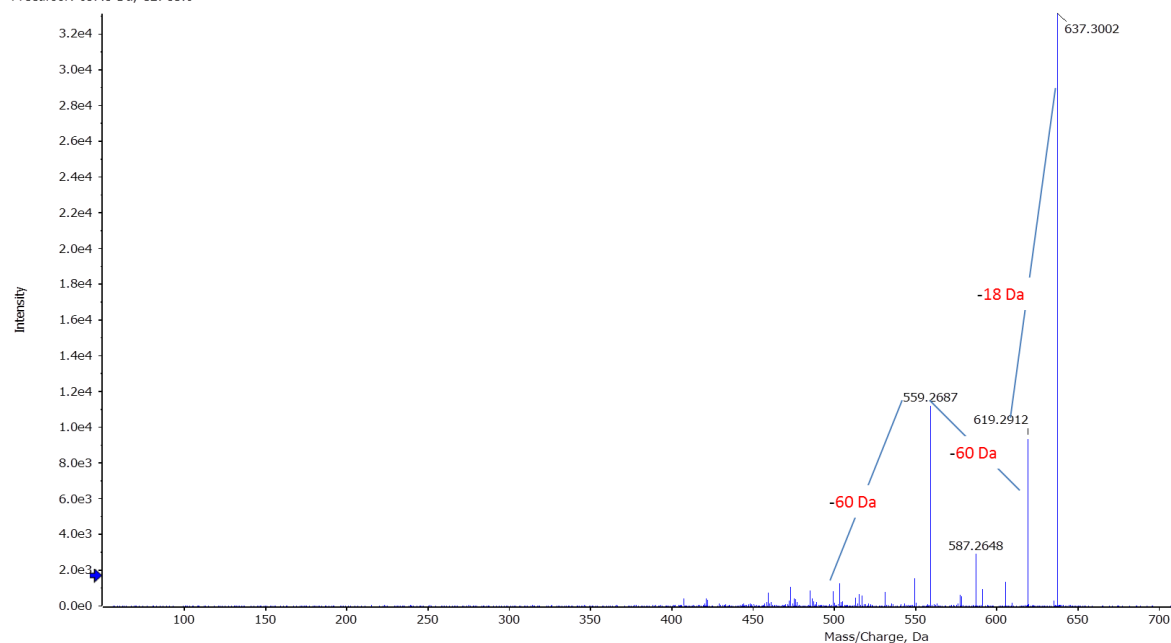

**Figure S15.** MS/MS for peak 114: Premyrsinol/peditithin derivatives.

Spectrum from 181128-SM0022.wiff (sample 1) - 181128-SM0022, Experiment 6, +TOF MS<sup>2</sup> (50 - 1000) from 21.962 min  
Precursor: 665.3 Da, CE: 46.5

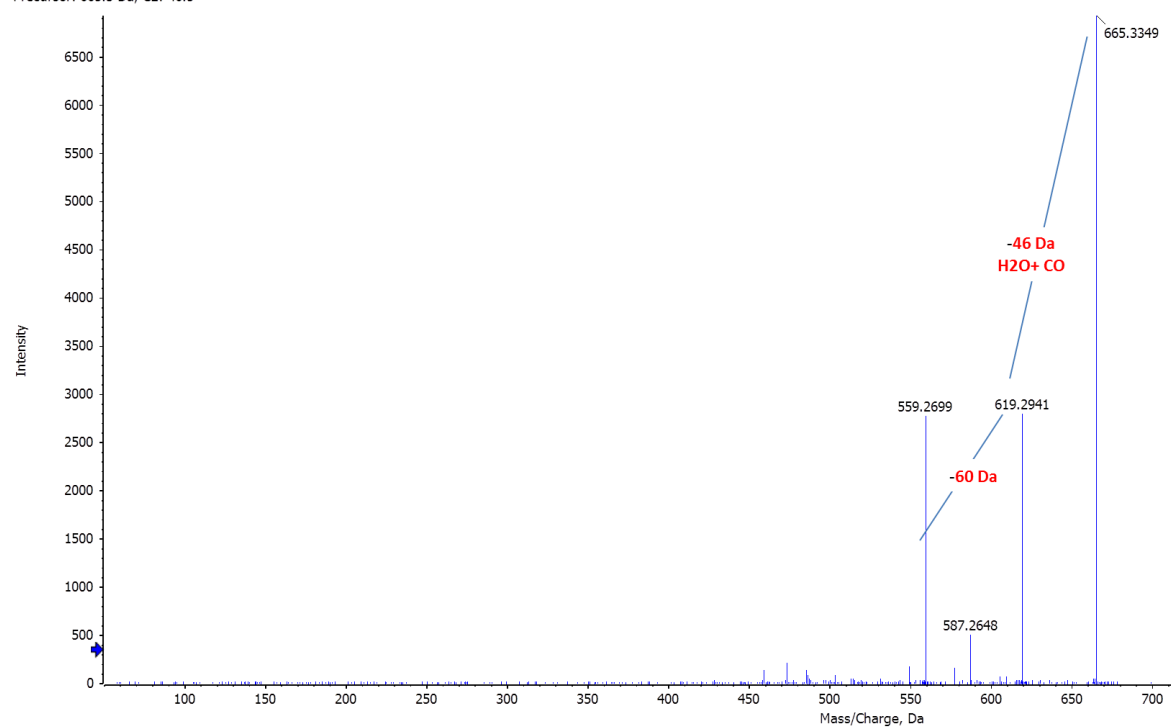

**Figure S16.** MS/MS of peak 125: Premyrsinol/peditithin derivative.

Spectrum from 181128-SM0022.wiff (sample 1) - 181128-SM0022, Experiment 4, +TOF MS<sup>2</sup> (50 - 1000) from 13.796 min  
Precursor: 557.3 Da, CE: 35.0

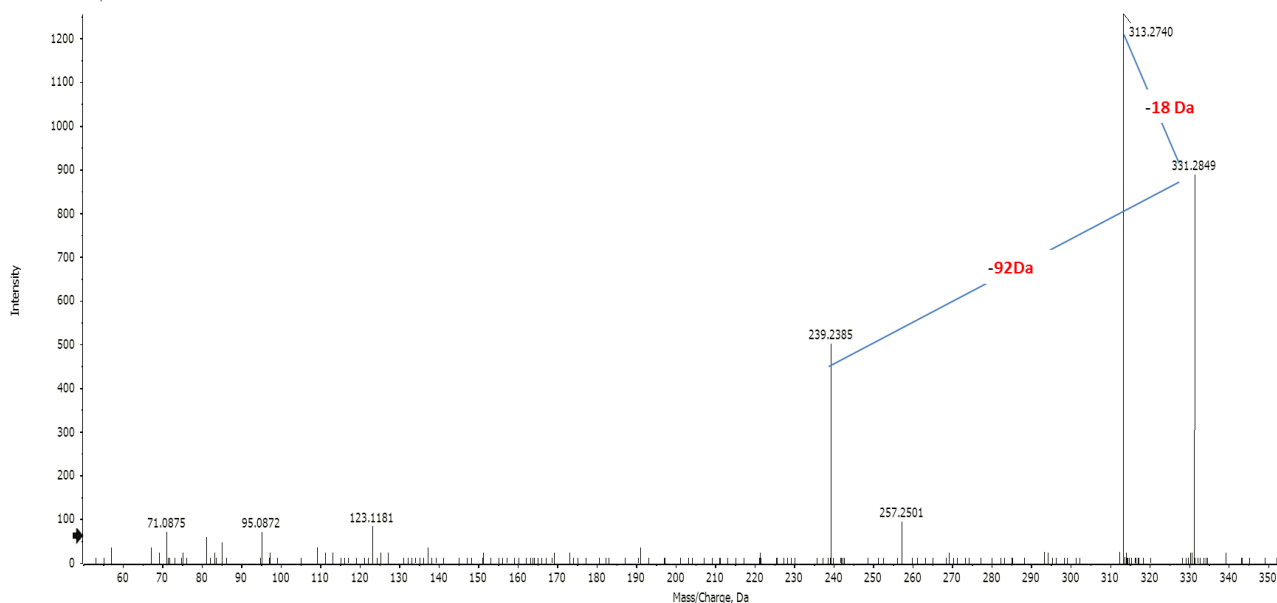

Figure S17. MS/MS of peak 82: Monopalmitin.

Spectrum from 181128-SM0022.wiff (sample 1) - 181128-SM0022, Experiment 15, +TOF MS<sup>2</sup> (50 - 1000) from 14.082 min  
Precursor: 467.3 Da, CE: 35.0

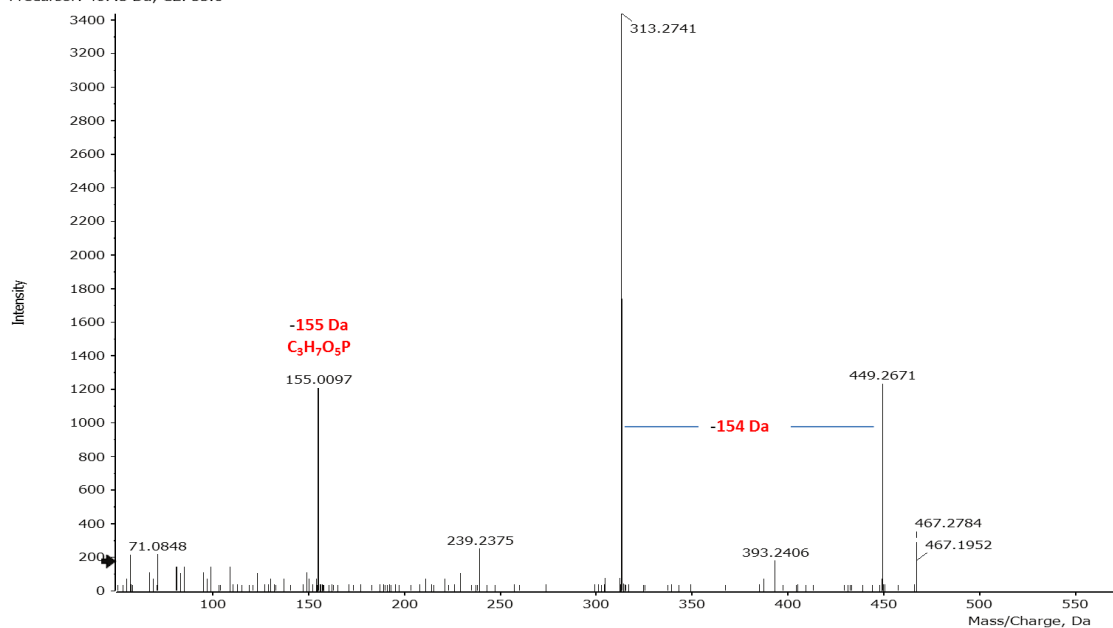

Figure S18. MS/MS of peak 84: Phosphatidic acid (10:0/9:0).

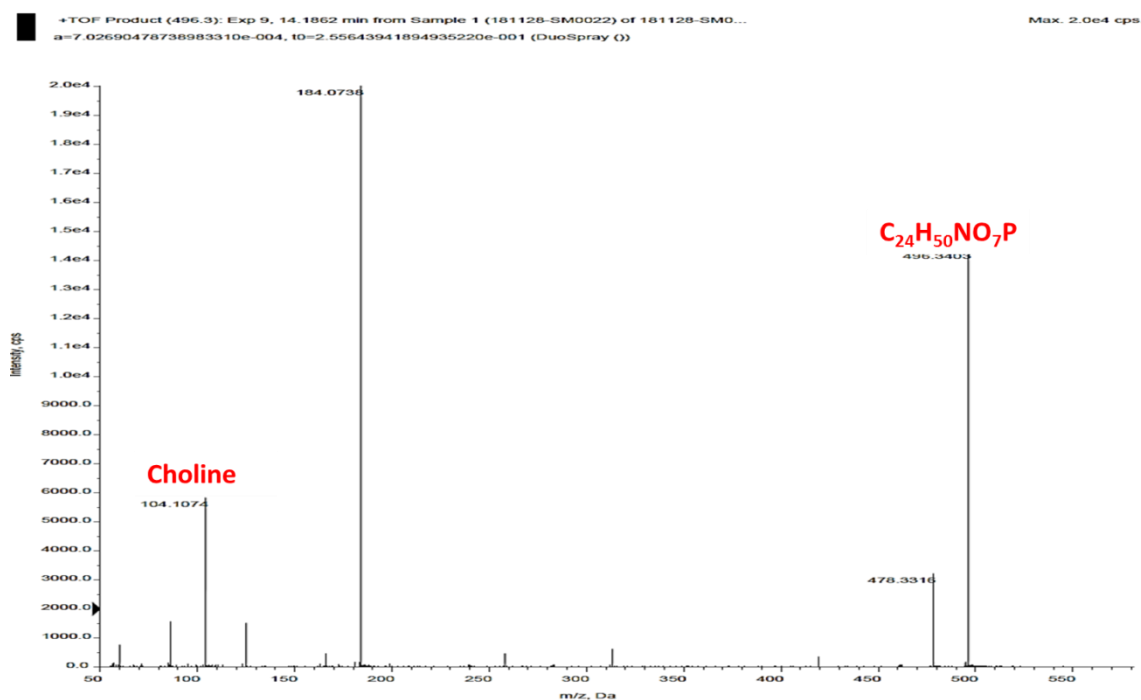

**Figure S19.** MS/MS of peak 86: Lysophosphatidylcholine (16:0/0:0).

**Table S1.** Analysis of high resolution MS/MS Q-TOF fragments for newly identified cyclic peptides.

| Peak No. | <i>m/z</i> | Calculated formula                                            | MS data    |                                                               | Neutral loss | Corresponding amino acid |
|----------|------------|---------------------------------------------------------------|------------|---------------------------------------------------------------|--------------|--------------------------|
|          |            |                                                               | <i>m/z</i> | calculated formula                                            |              |                          |
| 43/45    | 722.4774   | C <sub>36</sub> H <sub>64</sub> N <sub>7</sub> O <sub>8</sub> | 623.4151   | C <sub>31</sub> H <sub>55</sub> N <sub>6</sub> O <sub>7</sub> | -99 Da       | Val                      |
|          |            |                                                               | 510.3274   | C <sub>25</sub> H <sub>44</sub> N <sub>5</sub> O <sub>6</sub> | -113 Da      | Leu/Ile                  |
|          |            |                                                               | 397.2439   | C <sub>19</sub> H <sub>33</sub> N <sub>4</sub> O <sub>5</sub> | -113 Da      | Leu/Ile                  |
|          |            |                                                               | 298.1762   | C <sub>14</sub> H <sub>24</sub> N <sub>3</sub> O <sub>4</sub> | -99 Da       | Val                      |
|          |            |                                                               | 211.1440   | C <sub>11</sub> H <sub>19</sub> N <sub>2</sub> O <sub>2</sub> | -87 Da       | Ser                      |
| 46       | 809.5482   | C <sub>40</sub> H <sub>73</sub> N <sub>8</sub> O <sub>9</sub> | 722.4796   | C <sub>36</sub> H <sub>64</sub> N <sub>7</sub> O <sub>8</sub> | -87 Da       | ABA                      |
|          |            |                                                               | 623.4109   | C <sub>31</sub> H <sub>55</sub> N <sub>6</sub> O <sub>7</sub> | -99 Da       | Val                      |
|          |            |                                                               | 510.3336   | C <sub>25</sub> H <sub>44</sub> N <sub>5</sub> O <sub>6</sub> | -113 Da      | Leu/Ile                  |
|          |            |                                                               | 397.2439   | C <sub>19</sub> H <sub>33</sub> N <sub>4</sub> O <sub>5</sub> | -113 Da      | Leu/Ile                  |
|          |            |                                                               | 298.1762   | C <sub>14</sub> H <sub>24</sub> N <sub>3</sub> O <sub>4</sub> | -99 Da       | Val                      |
| 47       | 767.5383   | C <sub>38</sub> H <sub>71</sub> N <sub>8</sub> O <sub>8</sub> | 211.1436   | C <sub>11</sub> H <sub>19</sub> N <sub>2</sub> O <sub>2</sub> | -87 Da       | Ser                      |
|          |            |                                                               | 623.4102   | C <sub>31</sub> H <sub>55</sub> N <sub>6</sub> O <sub>7</sub> | -144 Da      | MeLys                    |
|          |            |                                                               | 510.3286   | C <sub>25</sub> H <sub>44</sub> N <sub>5</sub> O <sub>6</sub> | -113 Da      | Leu/Ile                  |
|          |            |                                                               | 397.2445   | C <sub>19</sub> H <sub>33</sub> N <sub>4</sub> O <sub>5</sub> | -113 Da      | Leu/Ile                  |
|          |            |                                                               | 298.1805   | C <sub>14</sub> H <sub>24</sub> N <sub>3</sub> O <sub>4</sub> | -99 Da       | Val                      |
| 55       | 668.4340   | C <sub>32</sub> H <sub>58</sub> N <sub>7</sub> O <sub>8</sub> | 211.1434   | C <sub>11</sub> H <sub>19</sub> N <sub>2</sub> O <sub>2</sub> | -87 Da       | Ser                      |
|          |            |                                                               | 555.3528   | C <sub>26</sub> H <sub>47</sub> N <sub>6</sub> O <sub>7</sub> | -113 Da      | Leu/Ile                  |
|          |            |                                                               | 442.2628   | C <sub>20</sub> H <sub>36</sub> N <sub>5</sub> O <sub>6</sub> | -113 Da      | Leu/Ile                  |
|          |            |                                                               | 385.2413   | C <sub>18</sub> H <sub>33</sub> N <sub>4</sub> O <sub>5</sub> | -57 Da       | Gly                      |
|          |            |                                                               | 284.1949   | C <sub>14</sub> H <sub>24</sub> N <sub>3</sub> O <sub>4</sub> | -101 Da      | Thr                      |
|          |            |                                                               | 171.1119   | C <sub>8</sub> H <sub>15</sub> N <sub>2</sub> O <sub>2</sub>  | -113 Da      | Lec/Ile                  |
|          |            |                                                               | 86.0964    | C <sub>5</sub> H <sub>12</sub> N                              | -85 Da       | Ala                      |

ABA : amino butyric acid, Ala : alanine, Gly : glycine, Ile : isoleucine, Leu: leucine, Lys : lysine, Ser : serine, Thr : threonine, Val : valine. Isoleucine and Leucine cannot be differentiated based on their high resolution mass.
